# Supplementary material for: Differential effects of radiation fractionation regimens on glioblastoma
Source: PubMed Central journal article supplement (PMC8788072; doi:10.1186/s13014-022-01990-y), 2022-01-25

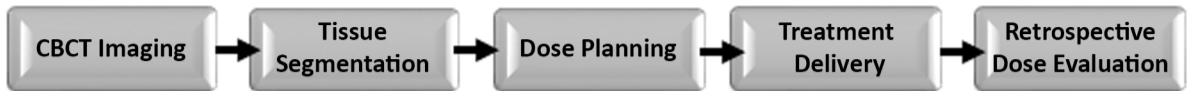

60 kV, 0.8 mA  
1.0 mm Al filtration  
360 projections

Bone,  
 Tissue,  
 Lung  
 Air

Beam or Arc  
(-180° to +180°)  
RT field size

Dose in cGy  
220 kV, 13.0 mA  
0.16 mm Cu filtration

Isodose  
DVH  
Mean dose to target

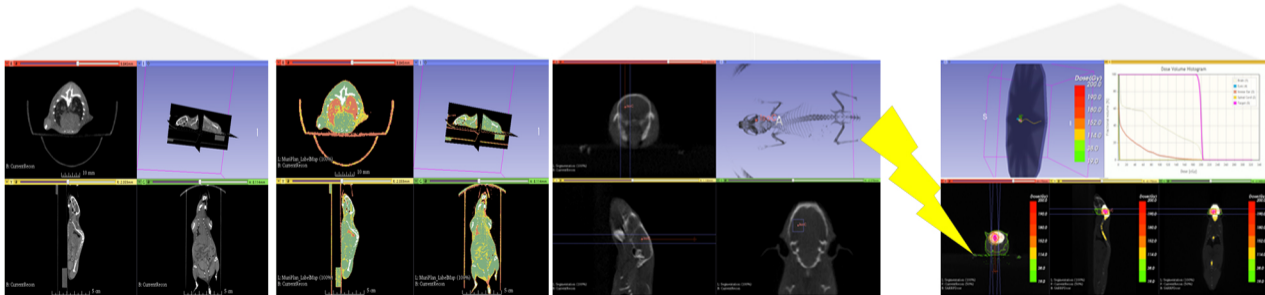

Supplement: 13014_2022_1990_MOESM3_ESM.pdf [file 13014_2022_1990_MOESM3_ESM.pdf]
