# Supplementary material for: Differential effects of radiation fractionation regimens on glioblastoma
Source: PubMed Central journal article supplement (PMC8788072; doi:10.1186/s13014-022-01990-y), 2022-01-25

a.

DNA Damage

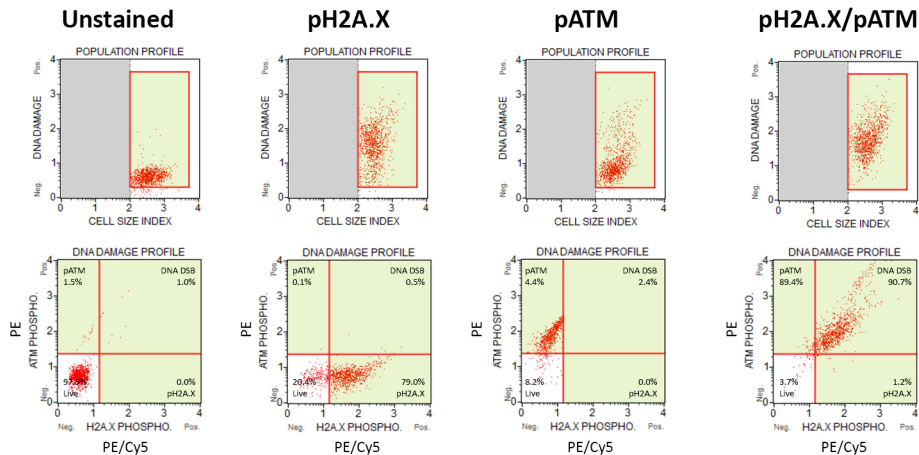

b.

Annexin-V &amp; Dead Cells

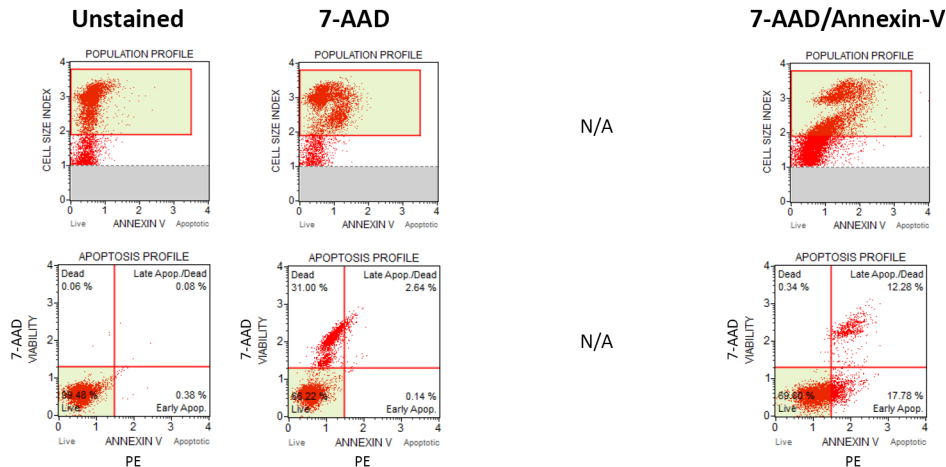

Supplement: 13014_2022_1990_MOESM4_ESM.pdf [file 13014_2022_1990_MOESM4_ESM.pdf]
